# Supplementary material
Source: publisher site journal article supplement (https://www.kjim.org/upload/media/kjim-2019-292-suppl1.pdf)
Supplement: Supplementary file 1 [file kjim-2019-292-suppl1.pdf]

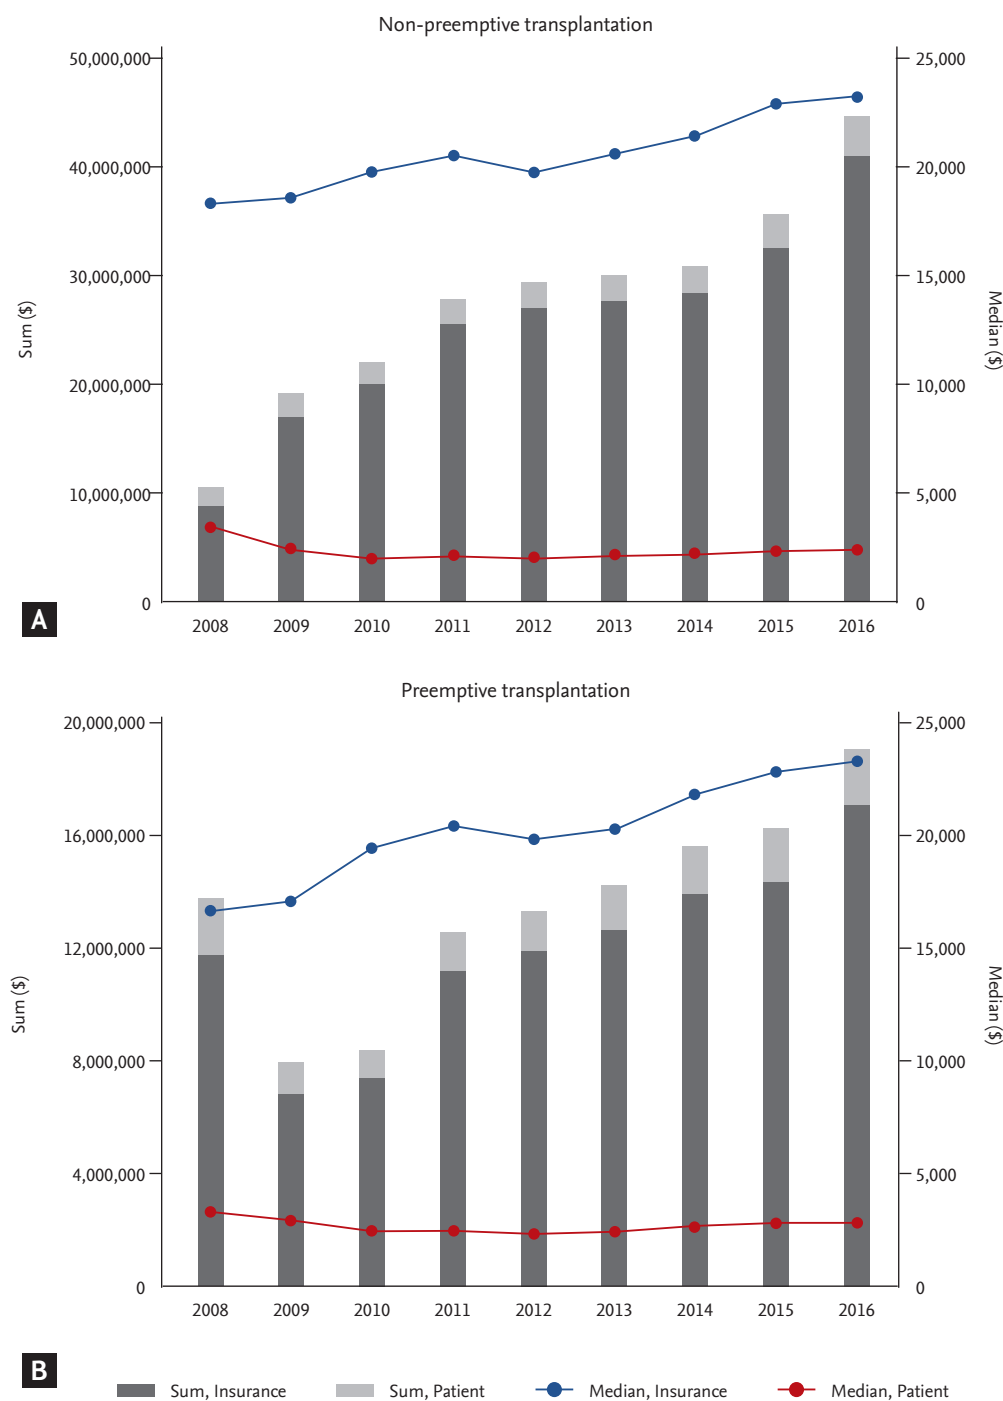

**Supplementary Figure 1.** Insured medical fee during the peri-transplant period in (A) non-preemptive and (B) preemptive transplantation case, respectively. The histograms indicate the sum of insured medical fee during the peri-transplant period, which was defined as from 1 month before to 3 months after the date of transplantation, following the left y-axes. The dark grey histograms indicate the insured fee covered by the national health insurance service, and the light-grey histograms indicate the fee paid by the patient. The line graphs indicate the median cost per patient, also collected during the peri-transplant period, following the right y-axes. The blue line graphs indicate the median cost burdened by the national health insurance service, and the red line graphs indicated the median cost paid by the patient. The currency exchange rate was 1,181.5 South Korean won for 1 US dollar.
